# Supplementary material
Source: Springer Nature journal article supplement (https://www.springermedizin.de/resource/supplementary/12985_2007_348_MOESM2_ESM.pdf/9607578)

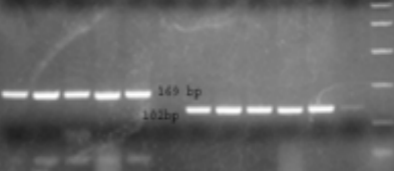

Supplement: MOESM2 [file 9607578]
